# Supplementary material
Source: Springer Nature journal article supplement (https://www.springermedizin.de/resource/supplementary/13075_2004_1375_MOESM2_ESM.pdf/9689632)

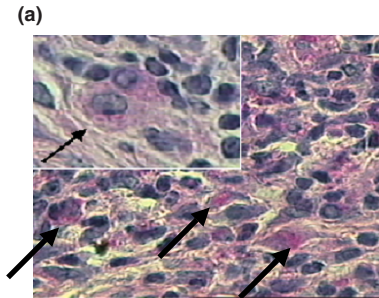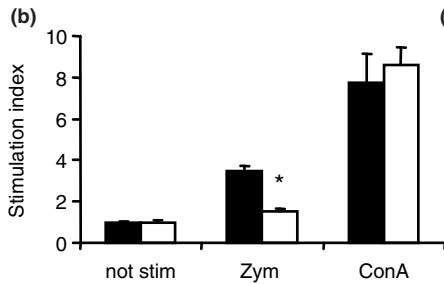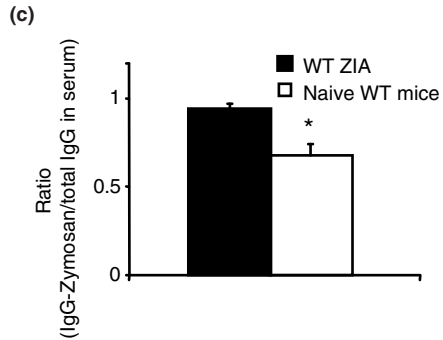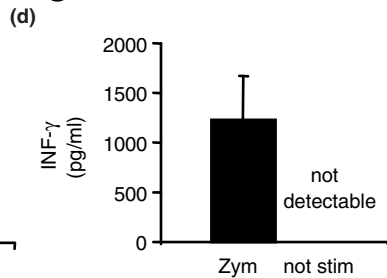

Supplement: MOESM2 [file 9689632]
